# Supplementary material for: Fabrication of a nano-sized Ag2CO3/reduced graphene oxide photocatalyst with enhanced visible-light photocatalytic activity and stability
Source: Royal Society of Chemistry journal article supplement (doi:10.1039/c4ra04792c), 2014-01-01
Supplement: c4ra04792c1.pdf [file c4ra04792c1.pdf]

## Electronic Supplementary Information

Gaopeng Dai<sup>a,b,\*</sup>, Suqin Liu<sup>a,b</sup>, Ying liang<sup>a</sup>, Tianxiong Luo<sup>a</sup>, and Ke Liu<sup>b</sup>

*a Department of chemical engineering and food science; Hubei University of arts and science,*

*Xiangyang 441053, P. R. China*

*b Hubei key laboratory of low dimensional optoelectronic materials and devices, Xiangyang*

*441053, P. R. China*

---

\*Corresponding Author.

Tel: 0086-710-3592609, Email: [dgp2000@126.com](mailto:dgp2000@126.com)

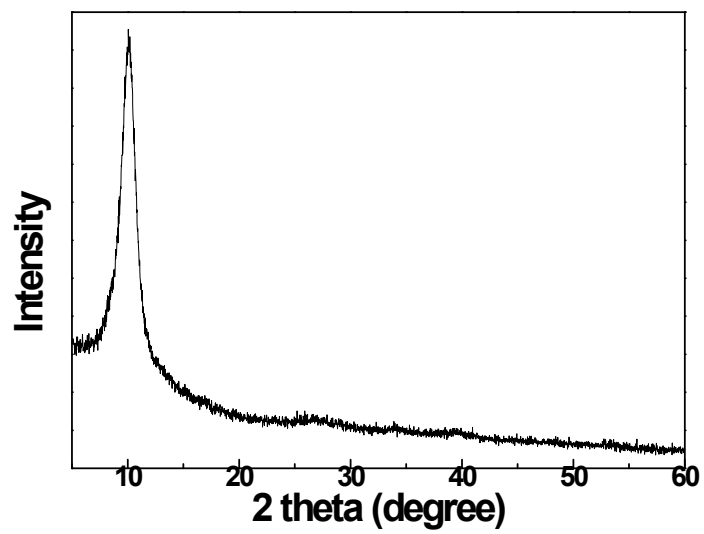

**Fig. S1** XRD pattern of reduced graphene oxide

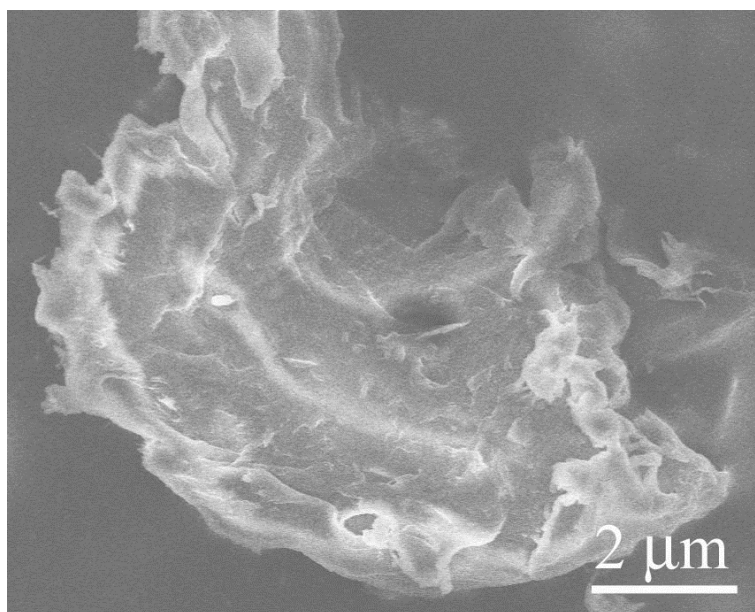

**Fig. S2** SEM image of reduced graphene oxide.

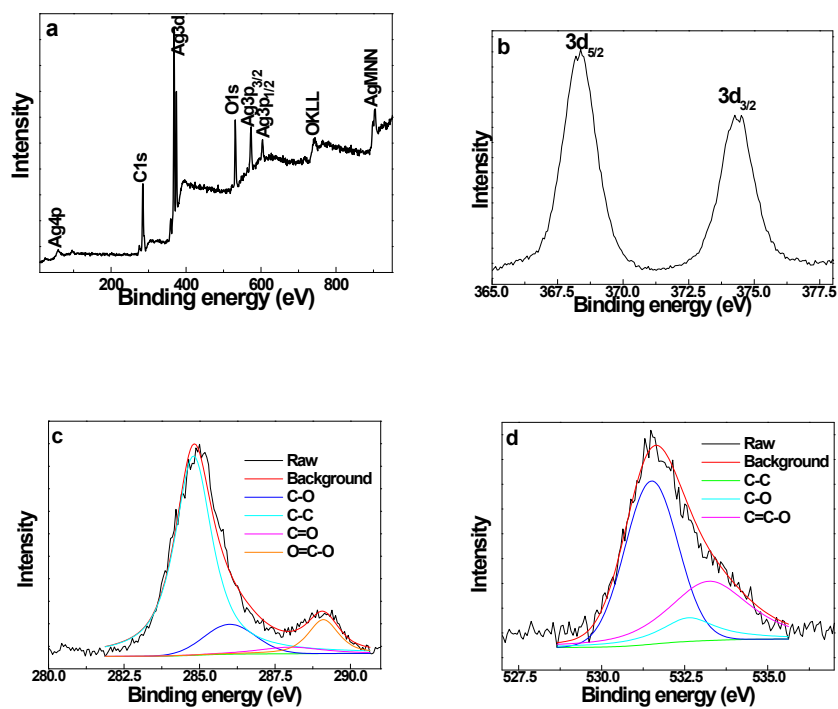

**Fig. S3** XPS spectra of (a) survey, (b) Ag 3d, (c) C 1s and (d) O 1s in  $\text{Ag}_2\text{CO}_3/2$  wt% RGO.

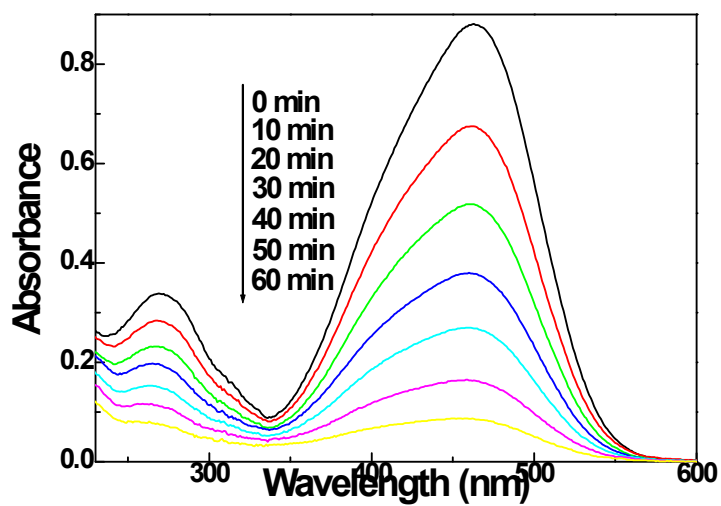

**Fig. S4** Absorption changes of methyl orange aqueous solution in the presence of  $\text{Ag}_2\text{CO}_3/2$  wt% RGO sample under visible light irradiation.
